# Supplementary material
Source: PubMed Central journal article supplement (PMC3973106)
Supplement: JCI45005sd.pdf [file JCI45005sd.pdf]

---

## **Soluble TNFRp75 regulates host protective immunity against *Mycobacterium tuberculosis*.**

---

Roanne Keeton<sup>1</sup>, Nasiema Allie<sup>1</sup>, Ivy Dambuza<sup>1</sup>, Brian Abel<sup>1</sup>, Nai-Jen Hsu<sup>1</sup>, Boipelo Sebesho<sup>1</sup>, Philippa Randall<sup>1</sup>, Patricia Burger<sup>1</sup>, Elizabeth Fick<sup>1</sup>, Valerie Quesniaux<sup>3</sup>, Bernhard Ryffel<sup>3</sup> and Muazzam Jacobs<sup>1,2</sup>

### **INSTITUTIONAL AFFILIATIONS**

<sup>1</sup> Division of Immunology, Department of Clinical Laboratory Sciences and the Institute of Infectious Disease and Molecular Medicine, University of Cape Town, South Africa

<sup>2</sup> National Health Laboratory Service, South Africa

<sup>3</sup> University of Orleans and CNRS UMR6218, Molecular Immunology and Embryology, 45071 Orleans, France

The authors have declared that no conflict of interest exists.

### **CORRESPONDING AUTHOR**

Muazzam Jacobs  
Room S1.33, Level 1, Werner Beit South  
Institute of Infectious Disease and Molecular Medicine  
Division of Immunology,  
Health Sciences Faculty  
University of Cape Town  
Anzio Road 7925 Observatory, Cape Town  
South Africa.  
Email: Muazzam.Jacobs@uct.ac.za  
Tel: +27 21 406 60 78 or +27 21 406 61 47

**Supplementary Figures**

1  
2  
3  
4  
5  
6

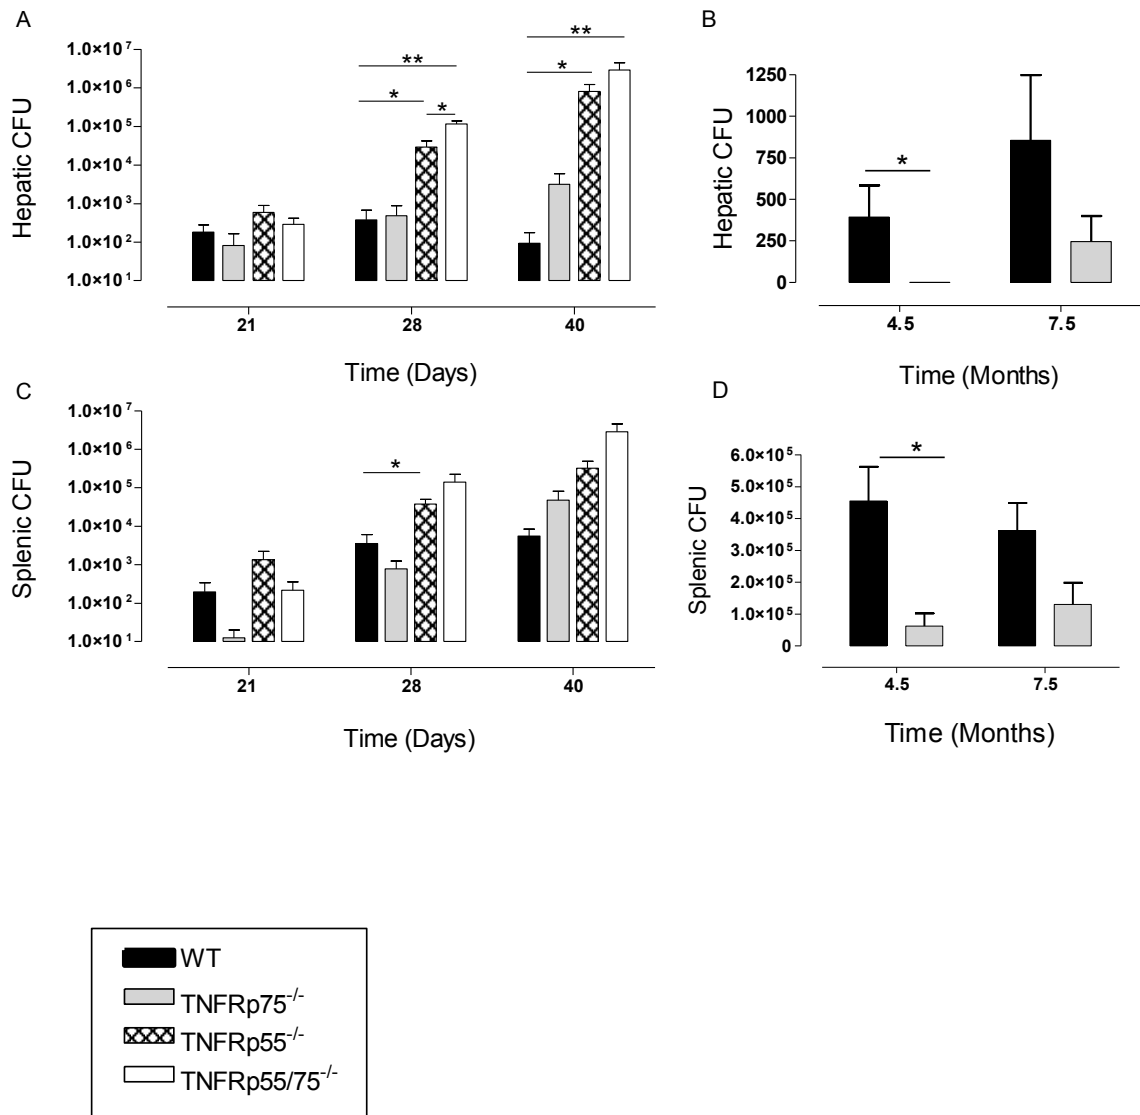

7  
8  
9  
10  
11  
12

Figure 1

13  
14  
15  
16  
17  
18  
19  
20

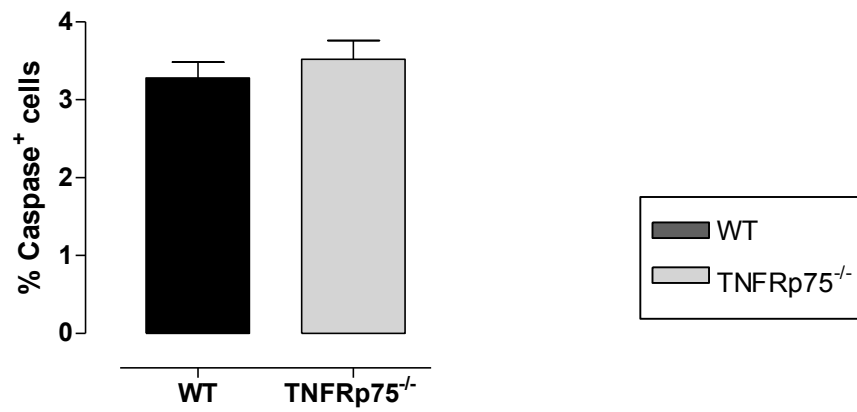

21  
22  
23  
24  
25  
26  
27  
28  
29  
30  
31  
32

Figure 2

33  
34  
35  
36

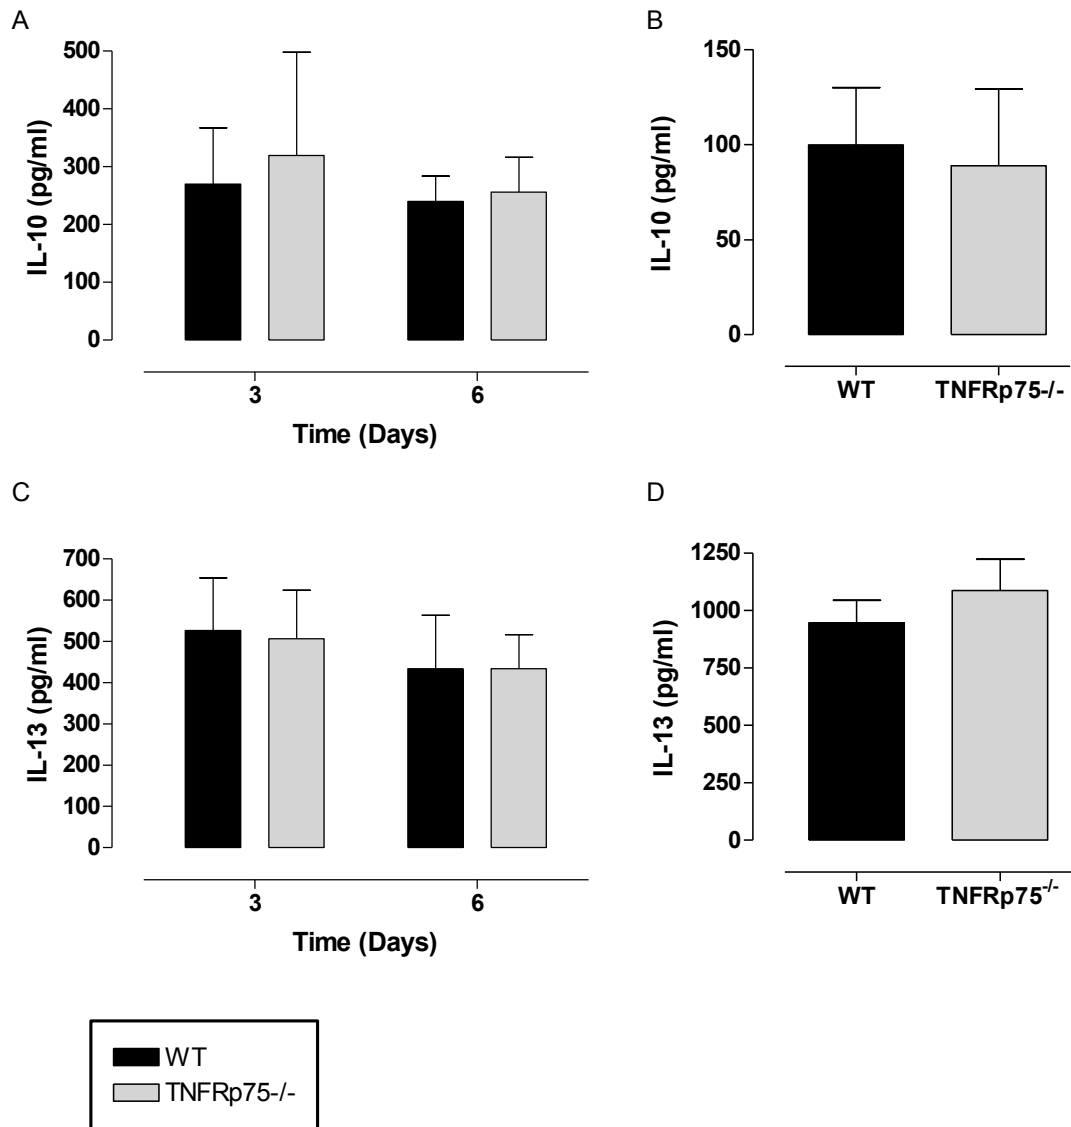

37  
38  
39  
40  
41  
42

Figure 3

43  
44  
45  
46  
47

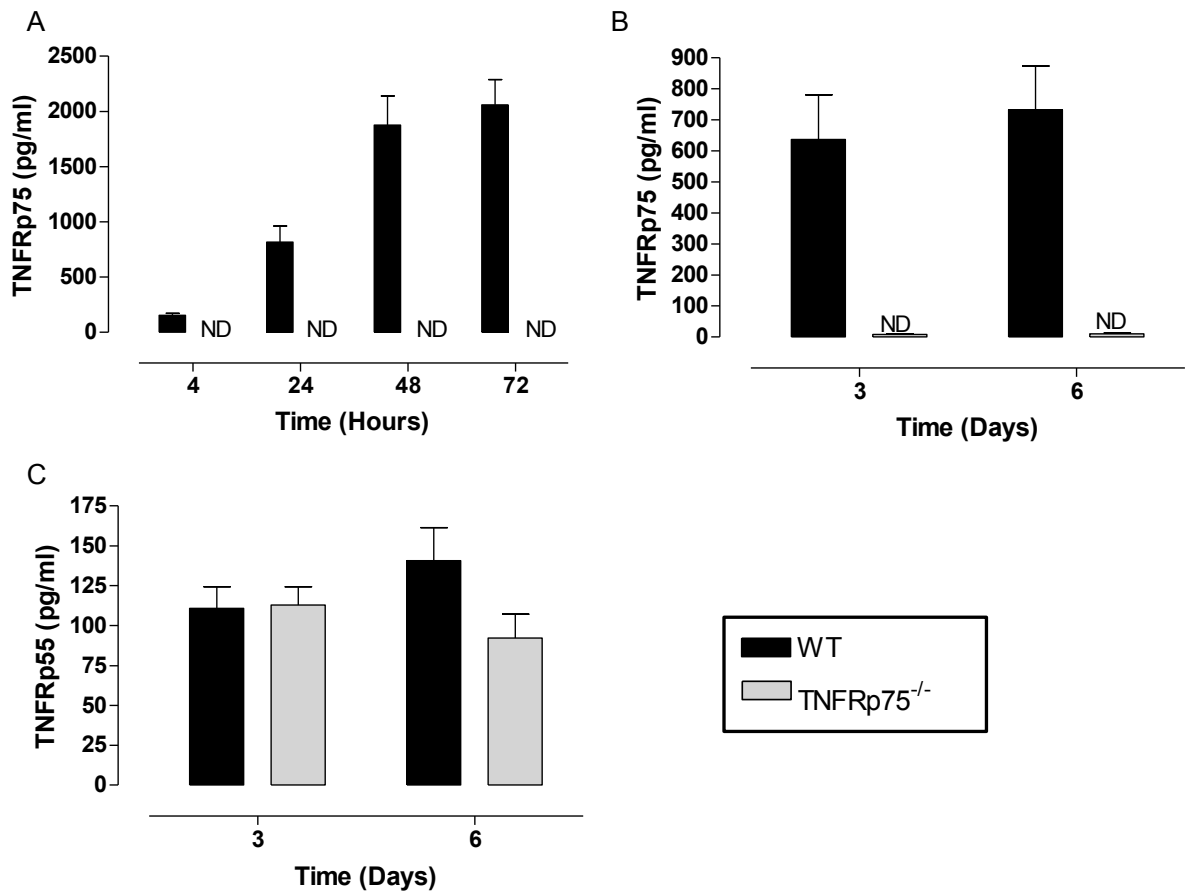

48  
49  
50  
51  
52  
53  
54  
55  
56

Figure 4

57

**SUPPLEMENTARY FIGURE LEGENDS**

58 **Figure 1: Enhanced control of dissemination in TNFRp75<sup>-/-</sup> mice during chronic *M.***  
59 ***tuberculosis* infection.** WT- , TNFRp75<sup>-/-</sup> , TNFRp55<sup>-/-</sup> and TNFRp55/75<sup>-/-</sup> mice were  
60 infected with 50-100 CFU *M. tuberculosis*. Extra-pulmonary bacilli burdens were determined  
61 in the liver (A and B) and spleen (B and D) during acute and chronic infection by colony  
62 enumeration assay. The data points are the mean ± SEM of the CFU of 4 mice per time  
63 point. Significant differences (\*p<0.05, \*\* p<0.01) were determined using the ANOVA test.  
64 The data are representative of three similar experiments.

65 **Figure 2: Dendritic cell apoptosis are equivalent in WT and TNFRp75<sup>-/-</sup> mice during**  
66 **acute *M. tuberculosis* infection.** WT and TNFRp75<sup>-/-</sup> mice were infected at 50-100 CFU  
67 with *M. tuberculosis* and lungs harvested at 14 days post-infection. The percentage of  
68 pulmonary CD11c<sup>+</sup> cells expressing Caspase 3 was analysed by flowcytometry. The data  
69 points represent the mean ± SEM of 5 mice/group. The data are representative of two similar  
70 experiments.

71 **Figure 3: T<sub>H</sub>2 cytokine production.** WT- and TNFRp75<sup>-/-</sup> mice were infected with 50-100  
72 CFU *M. tuberculosis*. IL10 (A and B) and IL13 (C and D) measured during acute infection in  
73 BALF and at 6 months, during chronic infection in lung homogenates by ELISA. The data  
74 points are the mean ± SEM of 4-5 mice/group and are representative of one of two similar  
75 experiments. Significant differences (\*p<0.05, \*\* p<0.01) were determined using ANOVA.  
76 (ND= not detectable).

77

78 **Figure 4: *M. tuberculosis* induces TNFRp75 shedding.** WT- and TNFRp75<sup>-/-</sup> bone  
79 marrow derived dendritic cells were infected with *M. tuberculosis* at an MOI of 5:1 and  
80 soluble TNFRp75 (A) was measured by ELISA. WT- and TNFRp75<sup>-/-</sup> mice were infected with  
81 50-100 CFU *M. tuberculosis* and soluble TNFRp75 (B) or TNFRp55 (C) measured in BALF  
82 by ELISA. The data points are the mean ± SEM of quadruplicate experiments and are  
83 representative of one of two experiments. (ND= not detectable).
